# Supplementary material for: Comprehensive analysis and experiment of hypoxia and EMT-related genes in prognosis and immune response of glioblastoma
Source: Research Square preprint supplement (doi:10.21203/rs.3.rs-2834333/v1), 2023-05-02
Supplement: Supplementary file 1 [file b55f85894f61a6f95fcbb5a3.xlsx]

## Sheet: Sheet1
Characteristic	TCGA-GBM(n=167)	CGGA-GBM(n=218)
Survival status
Alive	30 (7.8%)	35 (9.1%)
Dead	137（35.6%)	183（47.5)
Age, median (IQR)
Gender
Female	59 (15.3%)	85 (22.1%)
Male	108 (28.1%)	133 (34.5%)
IDH_mutation_status
Mutant	0 (0%)	32 (15.2%)
Wildtype	0 (0%)	179 (84.8%)
1p19q_codeletion_status
Codel	0 (0%)	4 (2.1%)
Non-codel	0 (0%)	188 (97.9%)
MGMTp_methylation_status
methylated	0 (0%)	95 (47.5%)
un-methylated	0 (0%)	105 (52.5%)
